# Supplementary material for: Polystyrene with a methoxytriphenylamine-conjugated-thiophene moiety side-chain as a dopant-free hole-transporting material for perovskite solar cells
Source: Royal Society of Chemistry journal article supplement (doi:10.1039/c8ta02960a), 2018-01-01
Supplement: c8ta02960a1.pdf [file c8ta02960a1.pdf]

## Polystyrene with methoxytriphenylamine-conjugated-thiophene moiety side-chain as a dopant-free hole-transporting material for perovskite solar cells

Jianchang Wu<sup>a,b</sup>, Chang Liu<sup>b</sup>, Manman Hu<sup>b</sup>, Wenchang Tan<sup>b,\*</sup>, Yanqing Tian<sup>b,\*</sup>, Baomin Xu<sup>b,\*</sup>

<sup>a</sup>*School of Advanced Materials, Peking University Shenzhen Graduate School, Shenzhen, Guangdong Province*

*518055, China*

<sup>b</sup>*Department of Materials Science and Engineering, Southern University of Science and Technology,*

*Shenzhen, Guangdong Province 518055, China*

*(E-mails: tanwch@pku.edu.cn, tianyq@sustc.edu.cn, xubm@sustc.edu.cn)*

### Content:

Table S1. Materials, quantities and cost for the synthesis of HTM-P1.

Figure S1. TGA of HTM-M1 and HTM-P1.

Figure S2. DSC of HTM-M1.

Figure S3. DSC of HTM-P1.

Figure S4. Water contact angles on HTM2, HTM-M1, and HTM-P1.

Figure S5. Current–voltage curves of the devices based on HTM-P1 with different concentration in chlorobenzene.

Table S2. Summary of device parameters of the devices based on HTM-P1 with different concentration in chlorobenzene; open-circuit voltage ( $V_{oc}$ ), short-circuit current density ( $J_{sc}$ ), fill factor (FF) and average efficiency (PCE).

Figure S6. <sup>1</sup>H NMR of 2.

Figure S7. <sup>13</sup>C NMR of 2.

Figure S8. HRMS of 2.

Figure S9. <sup>1</sup>H NMR of 3.

Figure S10. <sup>13</sup>C NMR of 3

Figure S11. HRMS of 3.

Figure S12. <sup>1</sup>H NMR of HTM-P1.

TableS1. Materials, quantities and cost for the synthesis of HTM-P1.

| Chemical                                           | Weight reagent (g/g) | Weight solvent (g/g) | Weight work up (g/g) | Price of chemical (\$/kg) | Cost of chemical (\$/g product) | Total Cost (\$/g) |
|----------------------------------------------------|----------------------|----------------------|----------------------|---------------------------|---------------------------------|-------------------|
| 3-Thiophenemethanol                                | 0.49                 |                      |                      | 1208.30                   | 0.59                            |                   |
| NBS                                                | 1.67                 |                      |                      | 40.72                     | 0.07                            |                   |
| THF                                                |                      | 3                    |                      | 11.85                     | 0.04                            |                   |
| Cealite                                            |                      |                      | 2                    | 0.57                      | 0.00                            |                   |
| diethyl ether                                      |                      |                      | 30                   | 4.52                      | 0.14                            |                   |
| NaOH                                               |                      |                      | 30                   | 3.16                      | 0.09                            |                   |
| Petroleum ether                                    |                      |                      | 200                  | 7.41                      | 1.48                            |                   |
| ethyl acetate                                      |                      |                      | 100                  | 4.53                      | 0.45                            |                   |
| silica gel                                         |                      |                      | 20                   | 10.96                     | 0.22                            |                   |
| Compound 1                                         |                      |                      |                      |                           |                                 | <b>3.08</b>       |
| Compound 1                                         | 0.44                 |                      |                      | 3081.36                   | 1.36                            |                   |
| 4-[Di(p-methoxyphenyl)amino]benzene-1-boronic acid | 1.20                 |                      |                      | 2265                      | 2.72                            |                   |
| Pd(PPh <sub>3</sub> ) <sub>4</sub>                 | 0.09                 |                      |                      | 9049.77                   | 0.81                            |                   |
| THF                                                |                      | 17.8                 |                      | 11.85                     | 0.21                            |                   |
| K <sub>2</sub> CO <sub>3</sub>                     | 1.10                 |                      |                      | 7.41                      | 0.01                            |                   |
| water                                              |                      | 10                   |                      |                           | 0.00                            |                   |
| CH <sub>2</sub> Cl <sub>2</sub>                    |                      |                      | 200                  | 4.44                      | 0.89                            |                   |
| Na <sub>2</sub> SO <sub>4</sub>                    |                      |                      | 5                    | 3.26                      | 0.02                            |                   |
| MeOH                                               |                      |                      | 10                   | 3.32                      | 0.03                            |                   |
| silica gel                                         |                      |                      | 20                   | 10.96                     | 0.22                            |                   |
| Compound 2                                         |                      |                      |                      |                           |                                 | <b>6.26</b>       |
| Compound 2                                         | 1.07                 |                      |                      | 6264.06                   | 5.32                            |                   |
| 4-Vinylbenzylchloride                              | 0.34                 |                      |                      | 301.66                    | 0.08                            |                   |
| NaH                                                | 0.05                 |                      |                      | 301.55                    | 0.13                            |                   |
| DMF                                                |                      | 5                    |                      | 5.42                      | 0.03                            |                   |
| Na <sub>2</sub> SO <sub>4</sub>                    |                      |                      | 5                    | 3.26                      | 0.02                            |                   |
| CH <sub>2</sub> Cl <sub>2</sub>                    |                      |                      | 200                  | 4.44                      | 0.89                            |                   |
| Petroleum ether                                    |                      |                      | 100                  | 7.41                      | 0.74                            |                   |
| silica gel                                         |                      |                      | 20                   | 10.96                     | 0.22                            |                   |
| Compound 3                                         |                      |                      |                      |                           |                                 | <b>8.72</b>       |
| Compound 3                                         | 1.16                 |                      |                      | 8715.48                   | 10.11                           |                   |
| AIBN                                               | 0.01                 |                      |                      | 49.01                     | 0.0005                          |                   |
| THF                                                |                      | 2                    |                      | 11.85                     | 0.02                            |                   |
| MeOH                                               |                      |                      | 20                   | 3.32                      | 0.07                            |                   |
| HTM-P1                                             |                      |                      |                      |                           |                                 | <b>10.20</b>      |

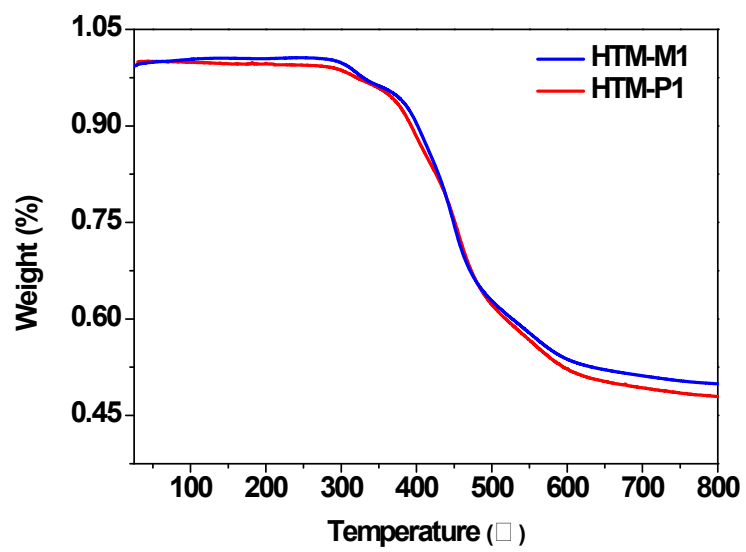

Figure S1. TGA of HTM-M1 and HTM-P1

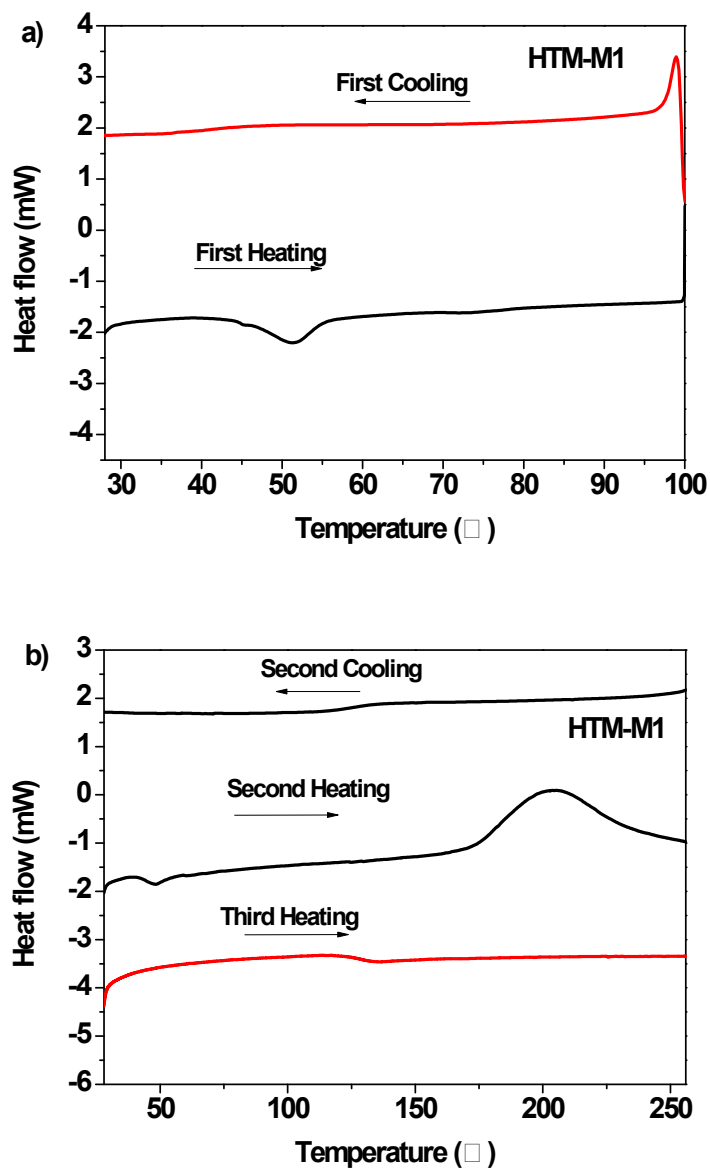

**Figure S2.** DSC of HTM-M1. a) The first heating and cooling (25 – 100 °C); b) the second heating and cooling, and the third heating (25 – 260 °C). The  $T_g$  of HTM-M1 is 46 °C, and the polymeric reaction of HTM-M1 begins at around 175 °C. From the Figure S2b we can see that the  $T_g$  increased to 125 °C after the polymerization of HTM-M1.

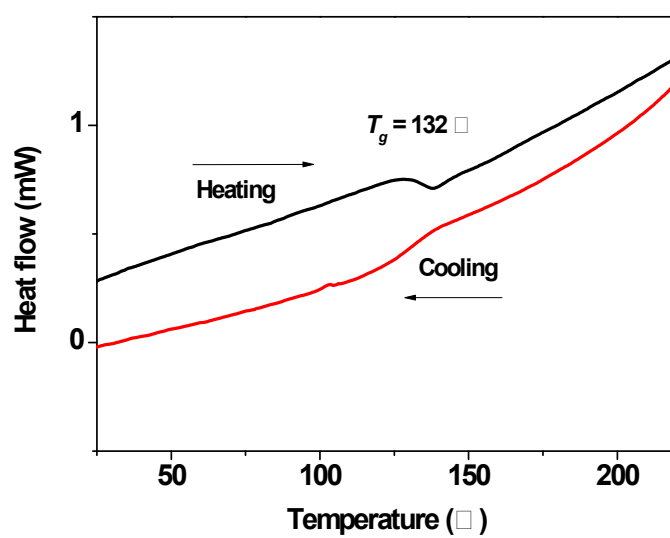

Figure S3. DSC of HTM-P1

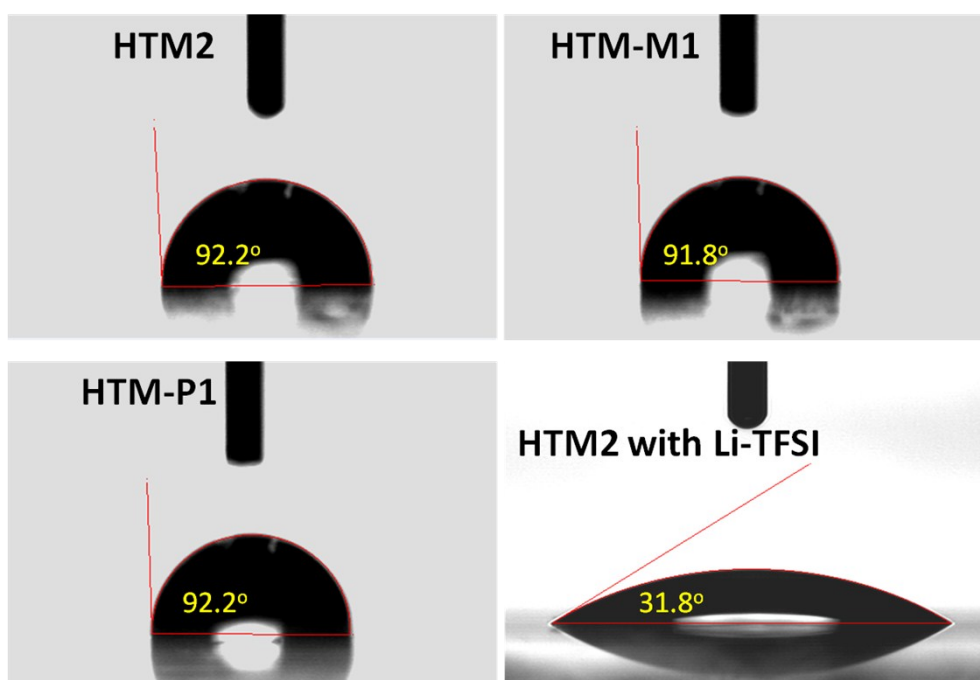

Figure S4. Water contact angles on HTM2, HTM-M1, HTM-P1, HTM2 with dopant (Li-TFSI).

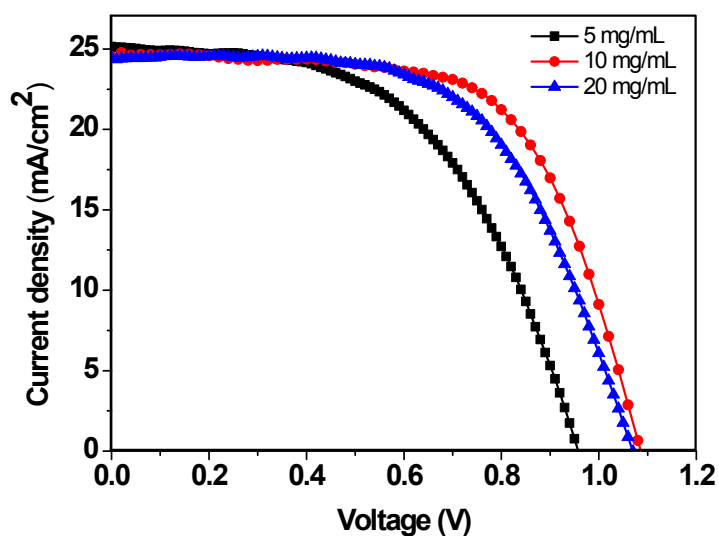

**Figure S5.** Current–voltage curves of the devices based on HTM-P1 with different concentrations in chlorobenzene.

Table S2. Summary of device parameters of the devices based on HTM-P1 with different concentrations in chlorobenzene; open-circuit voltage ( $V_{oc}$ ), short-circuit current density ( $J_{sc}$ ), fill factor (FF) and average efficiency (PCE).

|                 | $J_{sc}$<br>[mA cm <sup>-2</sup> ] | $V_{oc}$<br>[V] | FF   | Best PCE<br>[%] |
|-----------------|------------------------------------|-----------------|------|-----------------|
| <b>5 mg/mL</b>  | 25.0                               | 0.95            | 55.3 | 12.8            |
| <b>10 mg/mL</b> | 24.8                               | 1.08            | 63.9 | 17.2            |
| <b>20 mg/mL</b> | 24.7                               | 1.07            | 62.1 | 16.4            |

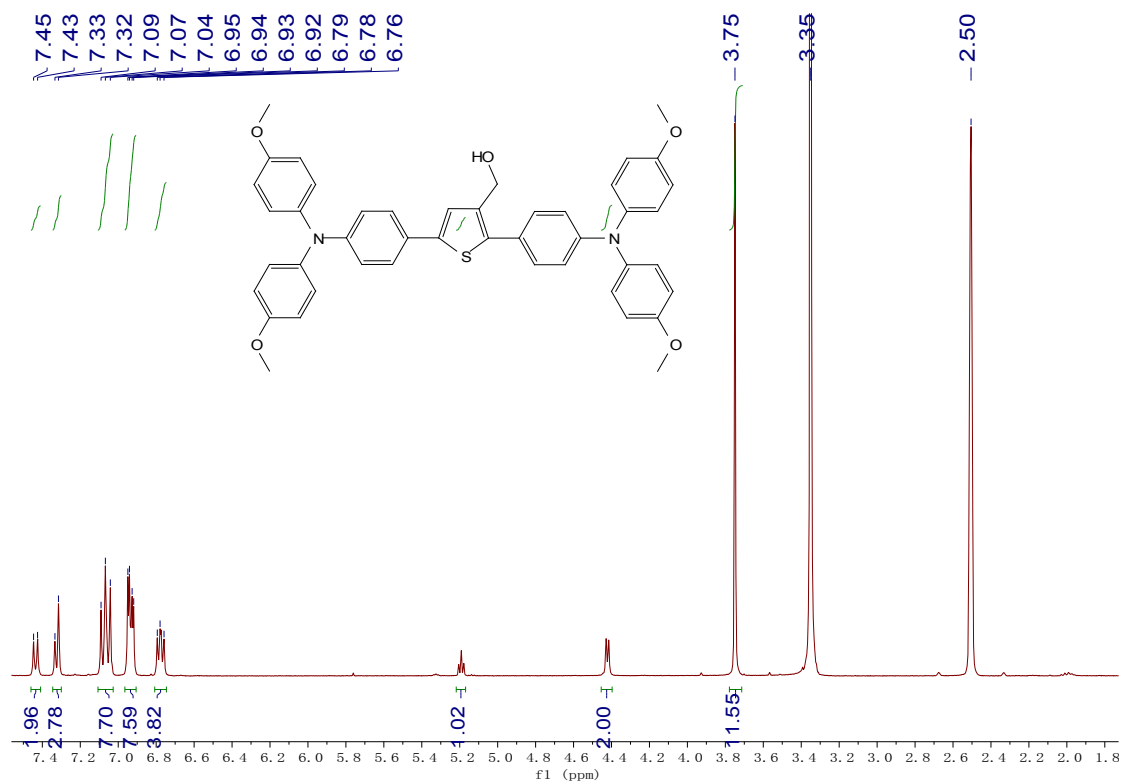

Figure S6. <sup>1</sup>H NMR of compound 2.

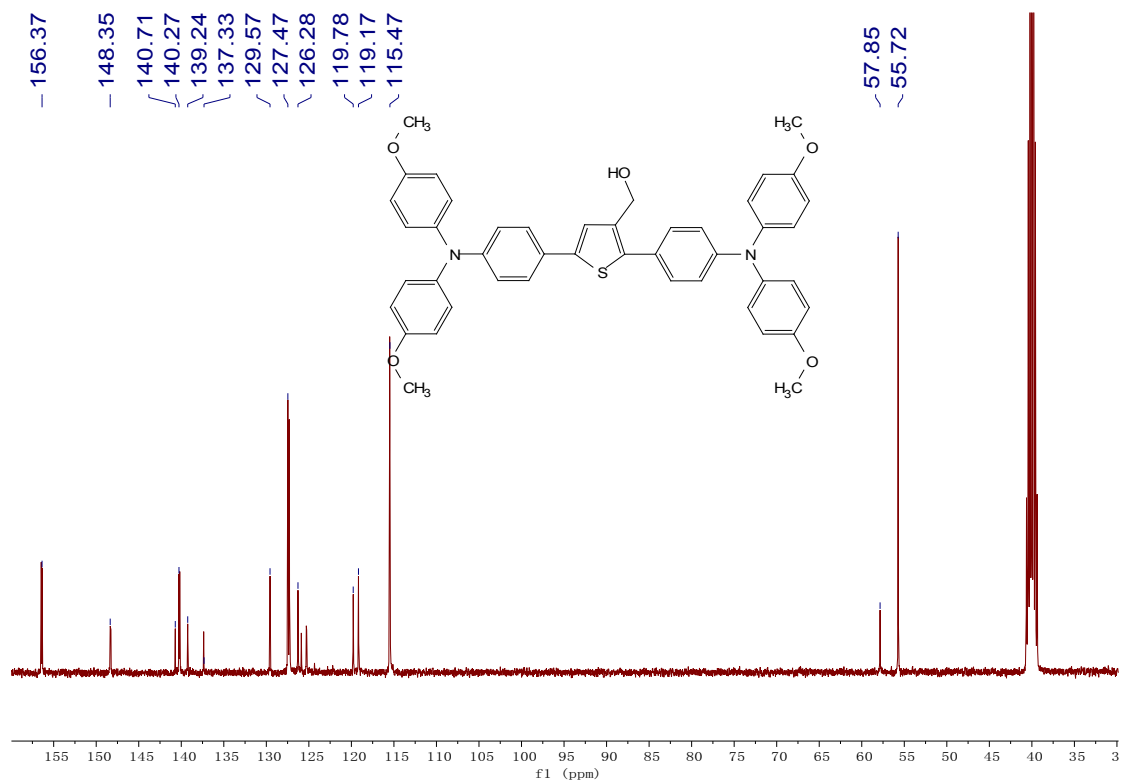

Figure S7. <sup>13</sup>C NMR of compound 2.

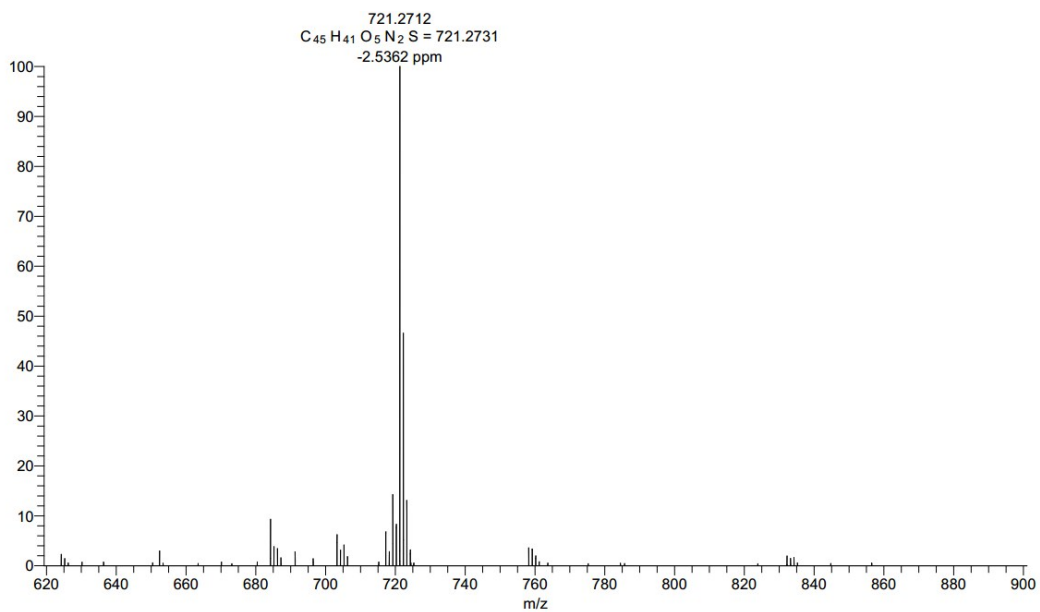

Figure S8. HRMS of compound 2.

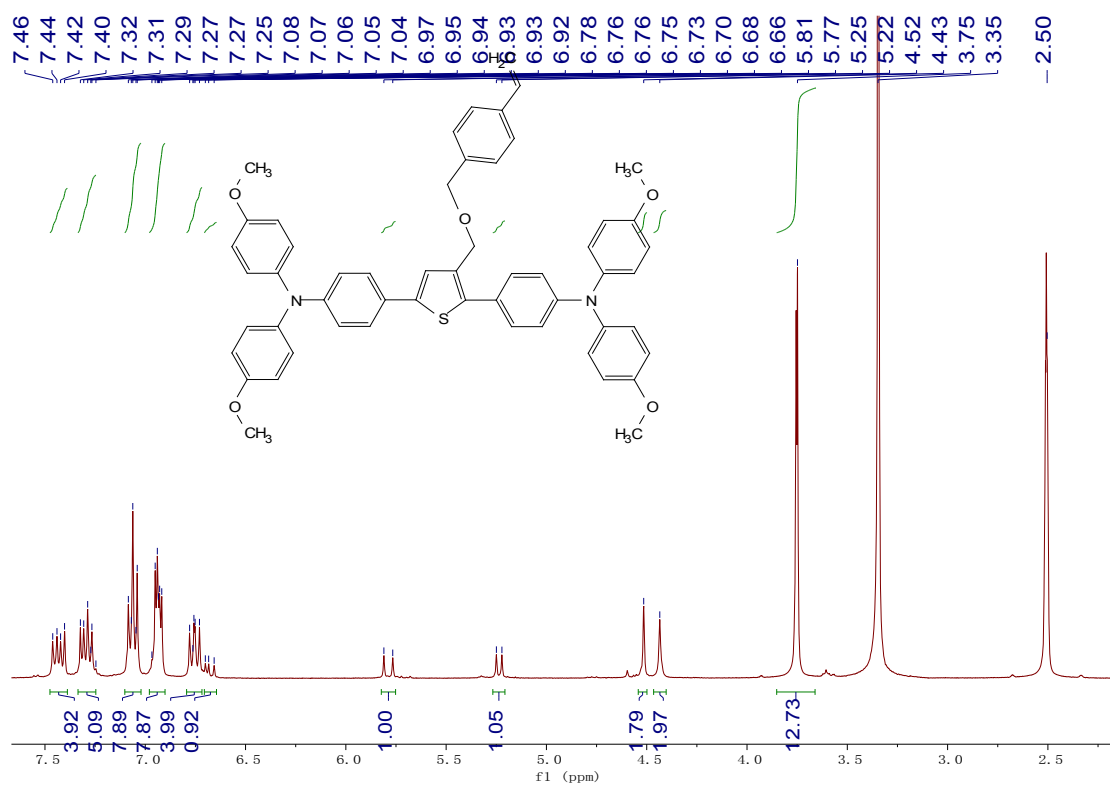

Figure S9. <sup>1</sup>H NMR of compound 3.



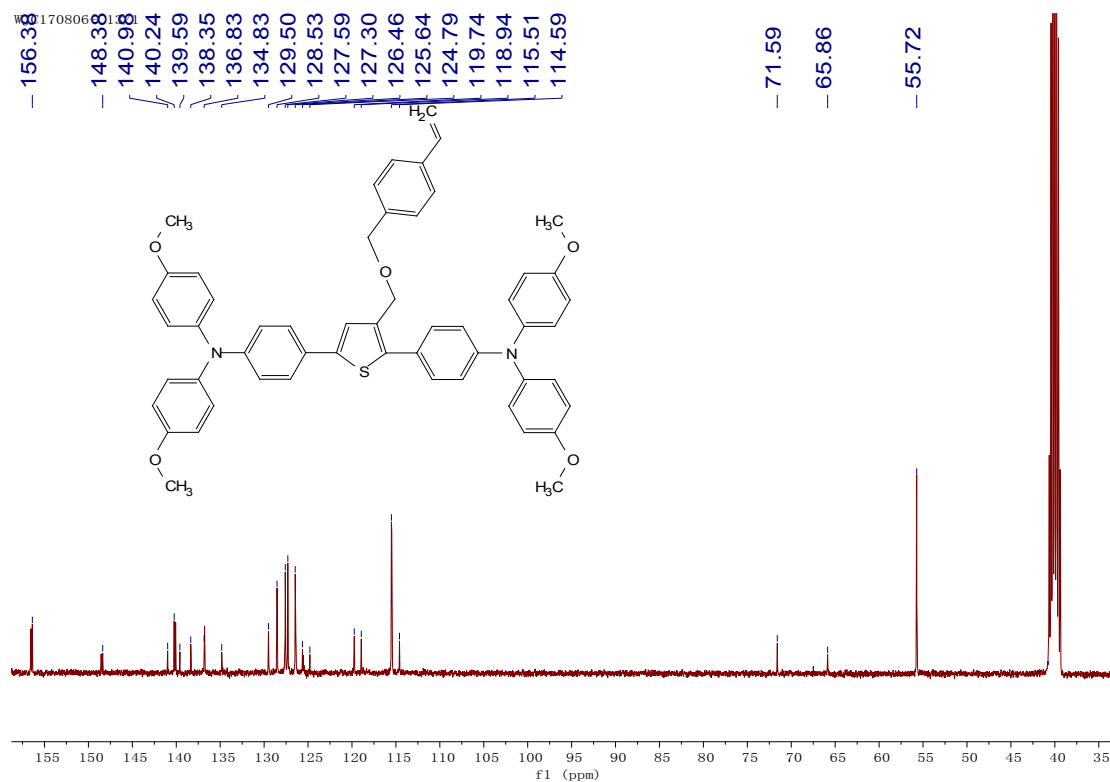

Figure S10. <sup>13</sup>C NMR of compound 3.

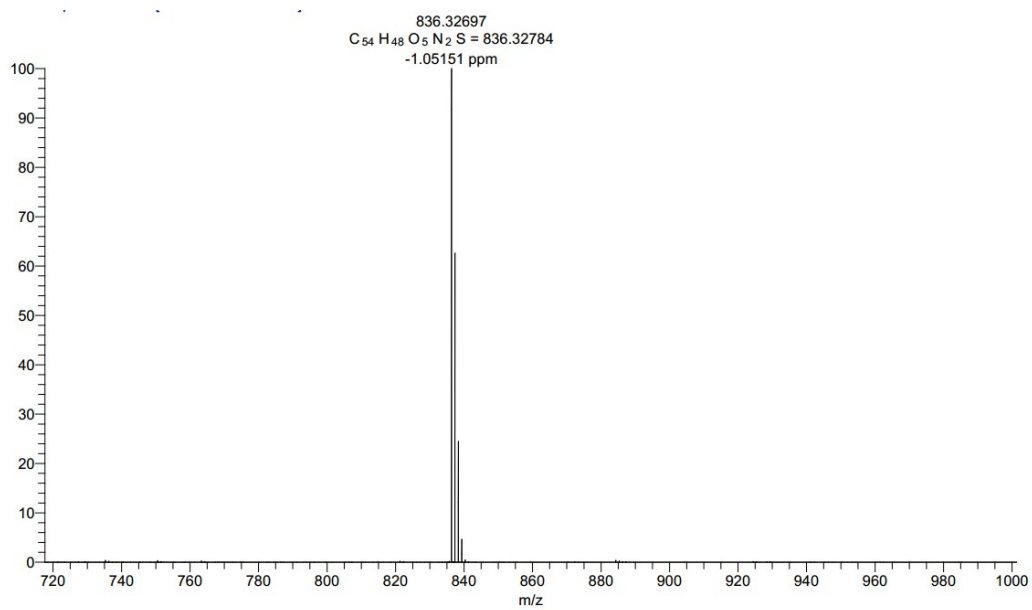

Figure S11. HRMS of compound 3.

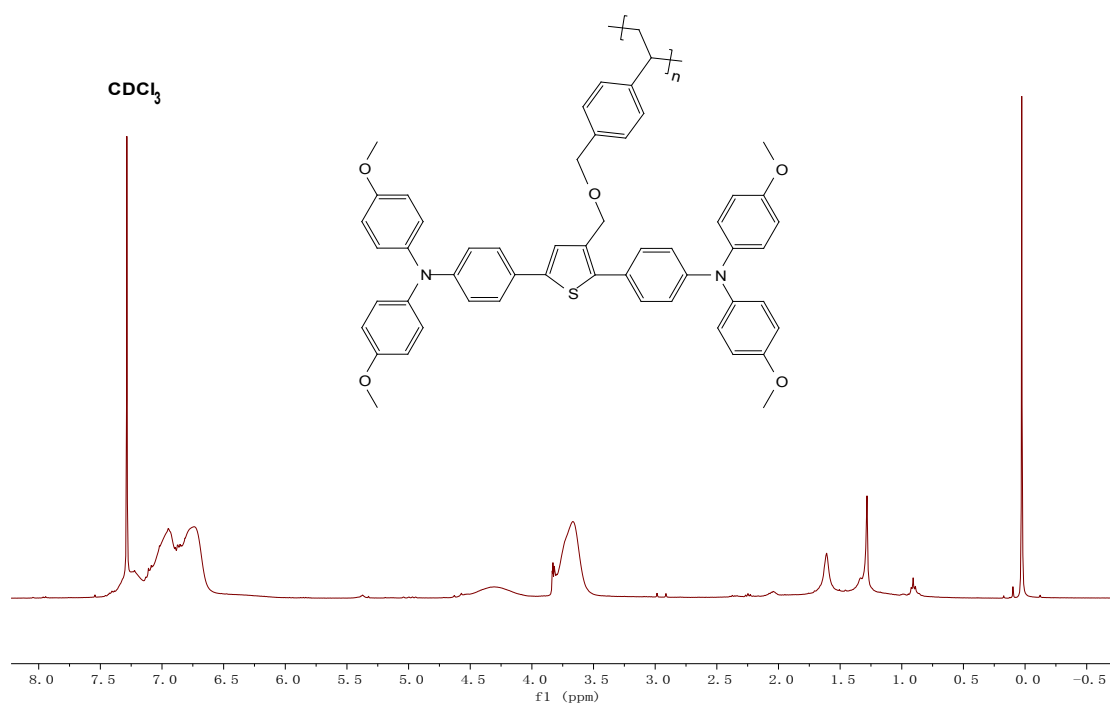

**Figure S12.**  $^1\text{H}$  NMR of HTM-P1.
